# Supplementary material for: Overexpression of an NADP(H)-dependent glutamate dehydrogenase gene, TrGDH, from Trichurus improves nitrogen assimilation, growth status and grain weight per plant in rice
Source: PubMed Central journal article supplement — Breed Sci. 2019 Aug 3;69(3):429–38. doi: 10.1270/jsbbs.19014 (PMC6776155; doi:10.1270/jsbbs.19014), 2019-08-03
Supplement: 69_19014_2.pdf [file 69_19014_2.pdf]

**Supplemental Table 1. Primers for PCR analysis**

| Primer name             | Sequence (5'-3')                      | Purpose                               |
|-------------------------|---------------------------------------|---------------------------------------|
| <i>TrGDH</i> -1F        | ATGTCCCACCTGCCTTTCGARCCNGARTT         | Clone of<br><i>TrGDH</i>              |
| <i>TrGDH</i> -1R        | CCACCAGTCACCCTGGTCRTGCATNGC           |                                       |
| <i>TrGDH</i> -pCold F   | AAAGGATCCATGTCCCACCTGCCTTTCGA         | Protein<br>expression                 |
| <i>TrGDH</i> -pCold R   | GG <u>AAGCTT</u> CCACCAGTCACCCTGGTCGT |                                       |
| <i>TrGDH</i> RT-qPCR F  | ACCGAGAACGAGGTCAGCA                   | RT-qPCR for<br>expression<br>analysis |
| <i>TrGDH</i> RT-qPCR R  | GCAACGAGCGAAGGAAGC                    |                                       |
| <i>OsGDH1</i> RT-qPCR F | GCTGTGGTACTGGAAAACCTG                 |                                       |
| <i>OsGDH1</i> RT-qPCR R | ATGCTCTGCAAGCAAGGCTTC                 |                                       |
| <i>OsGDH2</i> RT-qPCR F | ACGCTACTGAGGCTCTTTTGGC                |                                       |
| <i>OsGDH2</i> RT-qPCR R | TGATTCGTGCAGCCCATGA                   |                                       |
| <i>OsGDH3</i> RT-qPCR F | TCATCCATCAGAAAGGTGGCA                 |                                       |
| <i>OsGDH3</i> RT-qPCR R | CCTGTGCTTCAAGAGAGCAGGT                |                                       |
| <i>OsGDH4</i> RT-qPCR F | GCATTCCCTTGTGCATCACA                  |                                       |
| <i>OsGDH4</i> RT-qPCR R | TATAAGAACACGGCAGCCAGAGT               |                                       |
| <i>Actin1</i> RT-qPCR F | AACATCGTTCTCAGTGGTGGTA                |                                       |
| <i>Actin1</i> RT-qPCR R | GGAGGACGGCGATAACAG                    |                                       |

The underline indicates the restriction enzyme cleavage site sequence.

**Supplemental Table 2. Information of all the sequences used in phylogeny**

| <b>Gene</b>   | <b>Accession number</b> | <b>Locus number</b> | <b>Source species</b>                |
|---------------|-------------------------|---------------------|--------------------------------------|
| <i>AgGDH</i>  | XP_003177786            | /                   | <i>Arthroderma gypseum</i>           |
| <i>AcGDH</i>  | EEH08744                | /                   | <i>Ajellomyces capsulatus</i>        |
| <i>AnGDH</i>  | ACJ03788                | /                   | <i>Aspergillus niger</i>             |
| <i>AoGDH</i>  | XP_001821419            | /                   | <i>Aspergillus oryzae</i>            |
| <i>AtGDH1</i> | NM_121822               | AT5G18170           | <i>Arabidopsis thaliana</i>          |
| <i>BfGDH</i>  | XP_001547803            | /                   | <i>Botryotinia fuckeliana</i>        |
| <i>CeGDH</i>  | /                       | /                   | <i>Cylindrocarpon ehrenbergii</i>    |
| <i>CmGDH</i>  | EGX96726                | /                   | <i>Cordyceps militaris</i>           |
| <i>ChGDH</i>  | CCF37615                | /                   | <i>Colletotrichum higginsianum</i>   |
| <i>CpGDH</i>  | XP_003068285            | /                   | <i>Coccidioides posadasii</i>        |
| <i>CaGDH</i>  | EEQ44915                | /                   | <i>Candida albicans</i>              |
| <i>CgGDH</i>  | XP_001225369            | /                   | <i>Chaetomium globosum</i>           |
| <i>EcGDH</i>  | /                       | /                   | <i>Eurotium cheralieri</i>           |
| <i>EdGDH</i>  | EHY56229                | /                   | <i>Exophiala dermatitidis</i>        |
| <i>EnGDH</i>  | CAA34252                | /                   | <i>Emericella nidulans</i>           |
| <i>EcoGDH</i> | NP_416275               | /                   | <i>Escherichia coli</i>              |
| <i>GlGDH</i>  | EHK96567                | /                   | <i>Glarea lozoyensis</i>             |
| <i>GcGDH</i>  | EFX05298                | /                   | <i>Grosmannia clavigera</i>          |
| <i>MoGDH</i>  | XP_003715028            | /                   | <i>Magnaporthe oryzae</i>            |
| <i>MbGDH</i>  | EKD12453                | /                   | <i>Marssonina brunnea</i>            |
| <i>MaGDH</i>  | EFY85547                | /                   | <i>Metarhizium acridum</i>           |
| <i>MgGDH</i>  | /                       | /                   | <i>Magnaporthe grisea</i>            |
| <i>NcGDH</i>  | XP_961561               | /                   | <i>Neurospora crassa</i>             |
| <i>OsGDH1</i> | AK071839                | Loc_Os03g58040      | <i>Oryza sativa</i>                  |
| <i>OsGDH2</i> | AK065301                | Loc_Os04g45970      | <i>Oryza sativa</i>                  |
| <i>OsGDH3</i> | AK103028                | Loc_Os02g43470      | <i>Oryza sativa</i>                  |
| <i>OsGDH4</i> | AK120139                | Loc_Os01g37760      | <i>Oryza sativa</i>                  |
| <i>PcGDH</i>  | /                       | /                   | <i>Pleurotus cystidiosus</i>         |
| <i>PtGDH</i>  | XP_001934415            | /                   | <i>Pyrenophora tritici</i>           |
| <i>PbGDH</i>  | EEH48437                | /                   | <i>Paracoccidioides brasiliensis</i> |
| <i>PcGDH</i>  | XP_002565667            | /                   | <i>Penicillium chrysogenum</i>       |
| <i>SsGDH</i>  | XP_001590355            | /                   | <i>Sclerotinia sclerotiorum</i>      |
| <i>TriGDH</i> | EGR52650                | /                   | <i>Trichoderma reesei</i>            |
